# Supplementary material for: Efficacy and Safety of Pleural Cryobiopsy vs. Forceps Biopsy for Evaluation of Undiagnosed Pleural Effusion: A Systematic Review and Meta-Analysis
Source: Frontiers journal article supplement (doi:10.3389/fmed.2022.847146), 2022-04-11
Supplement: Data_Sheet_1.pdf [file Data_Sheet_1.pdf]

## Supplementary Material

### Contents

**Supplementary Appendix 1.** Full search terms used in the literature search of each database.

**Supplementary Figure 1.** Quality assessments of included studies using the QUADAS-2 tool.

**Supplementary Figure 2.** Funnel plots to detect publication bias for studies comparing specimen size.

**Supplementary Figure 3.** Leave-one-out sensitivity analysis of specimen size between cryobiopsy and forceps biopsy.

**Supplementary Figure 4.** Funnel plot to detect publication bias for studies comparing diagnostic yield between cryobiopsy and forceps biopsy.

**Supplementary Figure 5.** Forest plot of leave-one-out meta-analysis of the diagnostic yield.

**Supplementary Figure 6.** Forest plot of the leave-one-out meta-analysis of crush artifacts.

**Supplementary Figure 7.** Funnel plot to detect publication bias for studies comparing crush artifacts between cryobiopsy and forceps biopsy.

**Supplementary Figure 8.** Forest plot of specimen depth of pleural cryobiopsy versus forceps biopsy.

**Supplementary Figure 9.** Funnel plot to detect publication bias for studies comparing specimen depth between cryobiopsy and forceps biopsy.

**Supplementary Figure 10.** Forest plot of the leave-one-out meta-analysis of specimen depth.

**Supplementary Figure 11.** Forest plot of mild to moderate bleeding events occurred during pleural cryobiopsy versus forceps biopsy.

**Supplementary Figure 12.** Funnel plot of studies comparing cryobiopsy versus forceps biopsy for mild to moderate bleeding events.

**Supplementary Figure 13.** Forest plot of the leave-one-out meta-analysis of mild to moderate bleeding events.

**Supplementary Table 1.** Average specimen size obtained by pleural cryobiopsy and forceps biopsy.

**Supplementary Table 2.** Artefacts reported in included studies comparing pleural cryobiopsy versus forceps biopsy.

**Supplementary Table 3.** Qualitative analysis of depth of biopsy between pleural cryobiopsy and forceps biopsy.

**Supplementary Appendix 1- Full search terms used in the literature search of each database.**

**1. PubMed**

| <i>Search ID</i> | <i>Search Terms</i>                                                                      |
|------------------|------------------------------------------------------------------------------------------|
| #1               | ("Cryobiopsy" OR "Cryoprobe biopsy" OR "Forceps biopsy" OR "pleural cryobiopsy")         |
| #2               | ("Pleura*" OR "Pleural effusion" OR "pleural biopsy" OR "pleuroscopy" OR "thoracoscopy") |
| #3               | #1 AND #2 (Results retrieved n= 68)                                                      |

**2. Embase**

| <i>Search History</i> | <i>Searches</i>                                                                                                                                                                                            |
|-----------------------|------------------------------------------------------------------------------------------------------------------------------------------------------------------------------------------------------------|
| 1                     | ((('cryobiopsy'/exp OR cryobiopsy OR 'cryoprobe'/exp OR cryoprobe) AND ('biopsy'/exp OR biopsy) OR 'forceps'/exp OR forceps) AND ('biopsy'/exp OR biopsy) OR pleural) AND ('cryobiopsy'/exp OR cryobiopsy) |
| 2                     | ((pleura* OR pleural) AND ('effusion'/exp OR effusion) OR pleural) AND ('biopsy'/exp OR biopsy) OR 'pleuroscopy'/exp OR pleuroscopy OR 'thoracoscopy'/exp OR thoracoscopy                                  |
| 3                     | #1 AND #2 (Results retrieved n= 93)                                                                                                                                                                        |

**3. Scopus**

TITLE-ABS-KEY ( ( "Cryobiopsy" OR "Cryoprobe biopsy" OR "Forceps biopsy" OR "pleural cryobiopsy" ) AND ( "Pleura\*" OR "Pleural effusion" OR "pleural biopsy" OR "pleuroscopy" OR "thoracoscopy" ) ) (Results retrieved n= 106)

**4. Web of Science**

| <i>Search History</i> | <i>Searches</i> |
|-----------------------|-----------------|
|                       |                 |

|    |                                                                                                 |
|----|-------------------------------------------------------------------------------------------------|
| #1 | TS=("Cryobiopsy" OR " Cryoprobe biopsy " OR "Forceps biopsy" OR "pleural cryobiopsy")           |
| #2 | TS=("Pleura*" OR " Pleural effusion " OR " pleural biopsy " OR "pleuroscopy" OR "thoracoscopy") |
| #3 | #1 AND #2 ( Results retrieved n= 94)                                                            |

**Supplementary Figure 1. Quality assessments of included studies using the QUADAS-2 tool.** **A)** Risk of bias graph: Review authors' judgments about each risk of bias item presented as percentages across all included randomized controlled studies. **B)** Risk of bias summary: Review authors' judgments for each risk of bias item for the included studies.

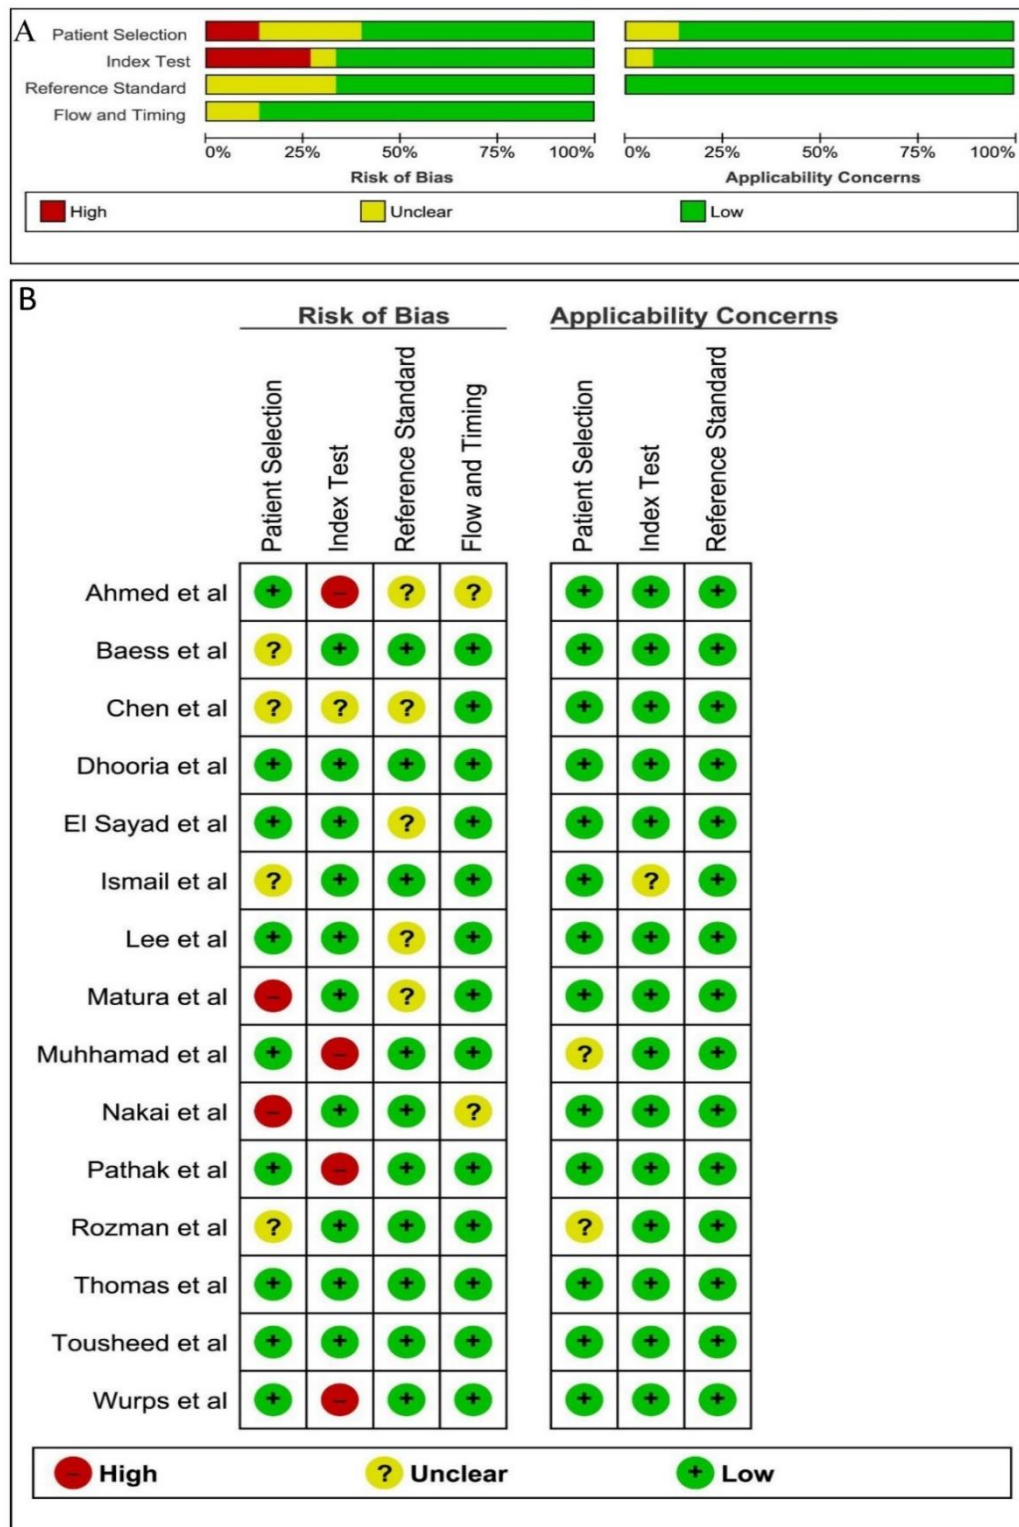

**Supplementary Figure 2. Funnel plot to detect publication bias for studies comparing specimen size.**

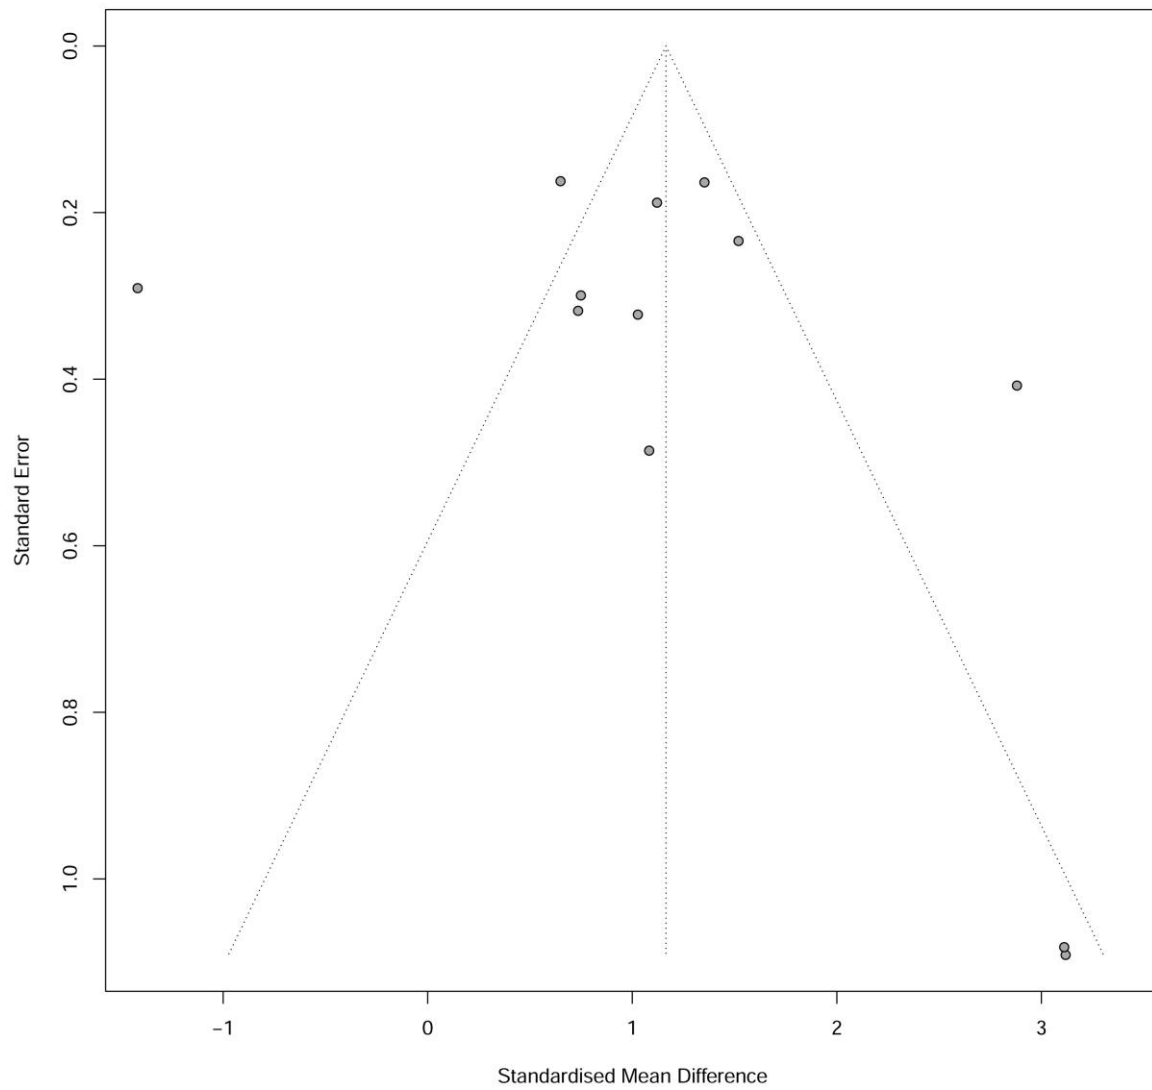

**Supplementary Figure 3. Leave-one-out sensitivity analysis of specimen size between cryobiopsy and forceps biopsy**

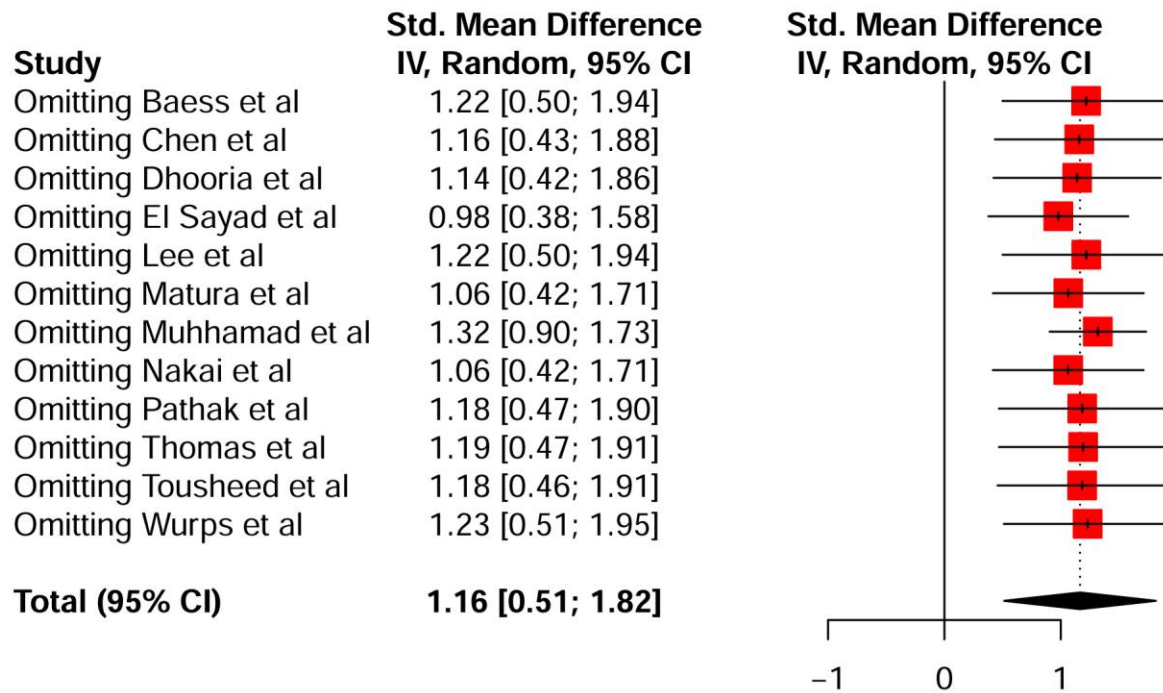

**Supplementary Figure 4. Funnel plot to detect publication bias for studies comparing diagnostic yield between cryobiopsy and forceps biopsy**

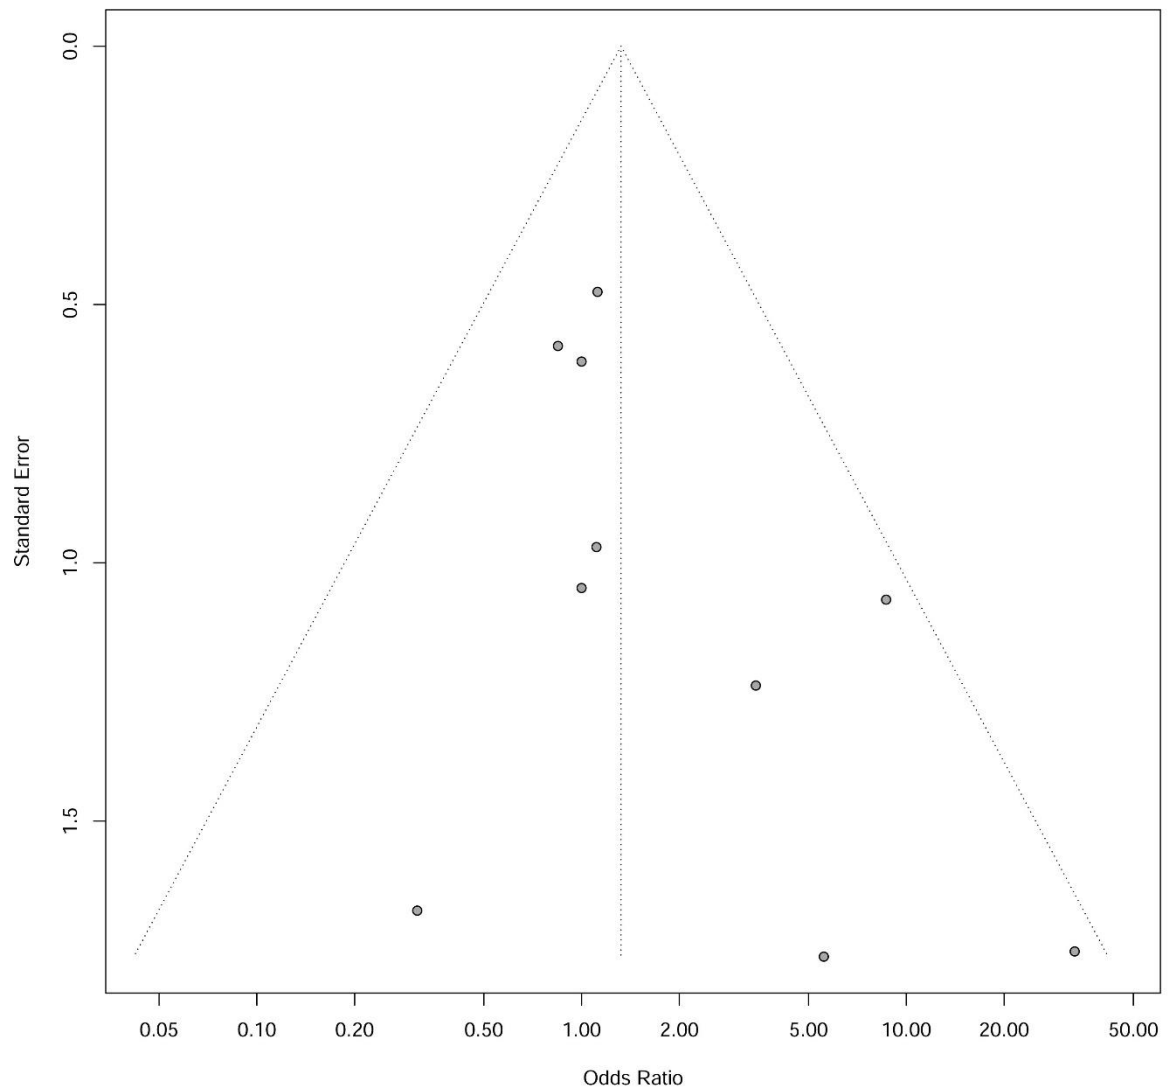

**Supplementary Figure 5. Forest plot of leave-one-out meta-analysis of the diagnostic yield**

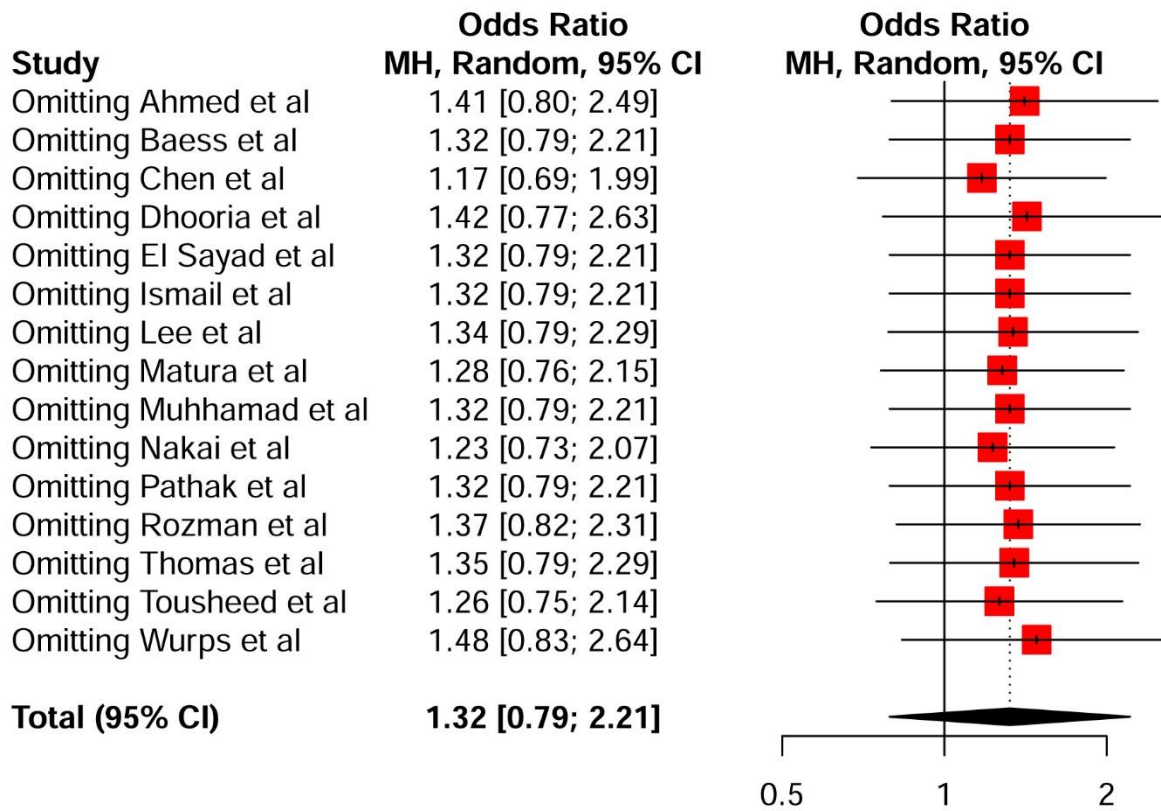



**Supplementary Figure 6. Forest plot of the leave-one-out meta-analysis of crush artifacts**

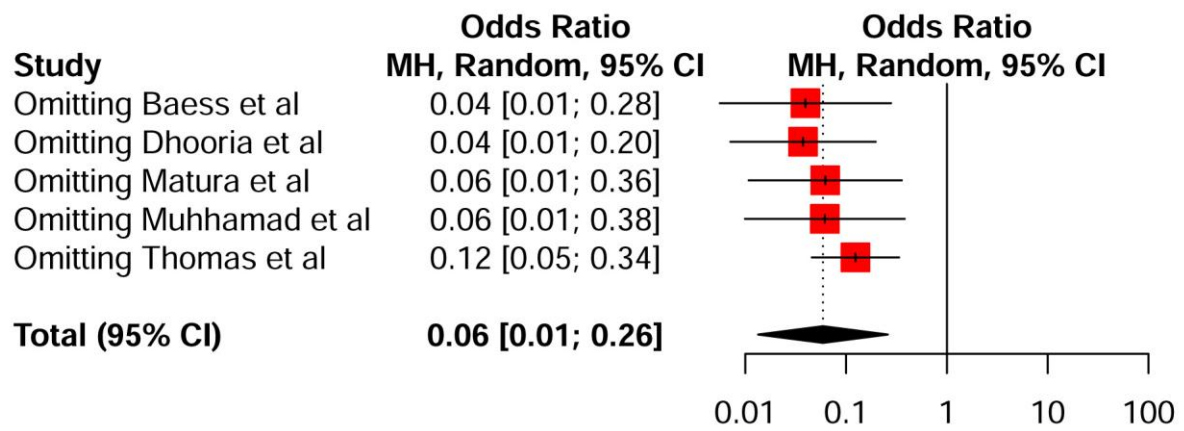

**Supplementary Figure 7. Funnel plot to detect publication bias for studies comparing crush artifacts between cryobiopsy and forceps biopsy**

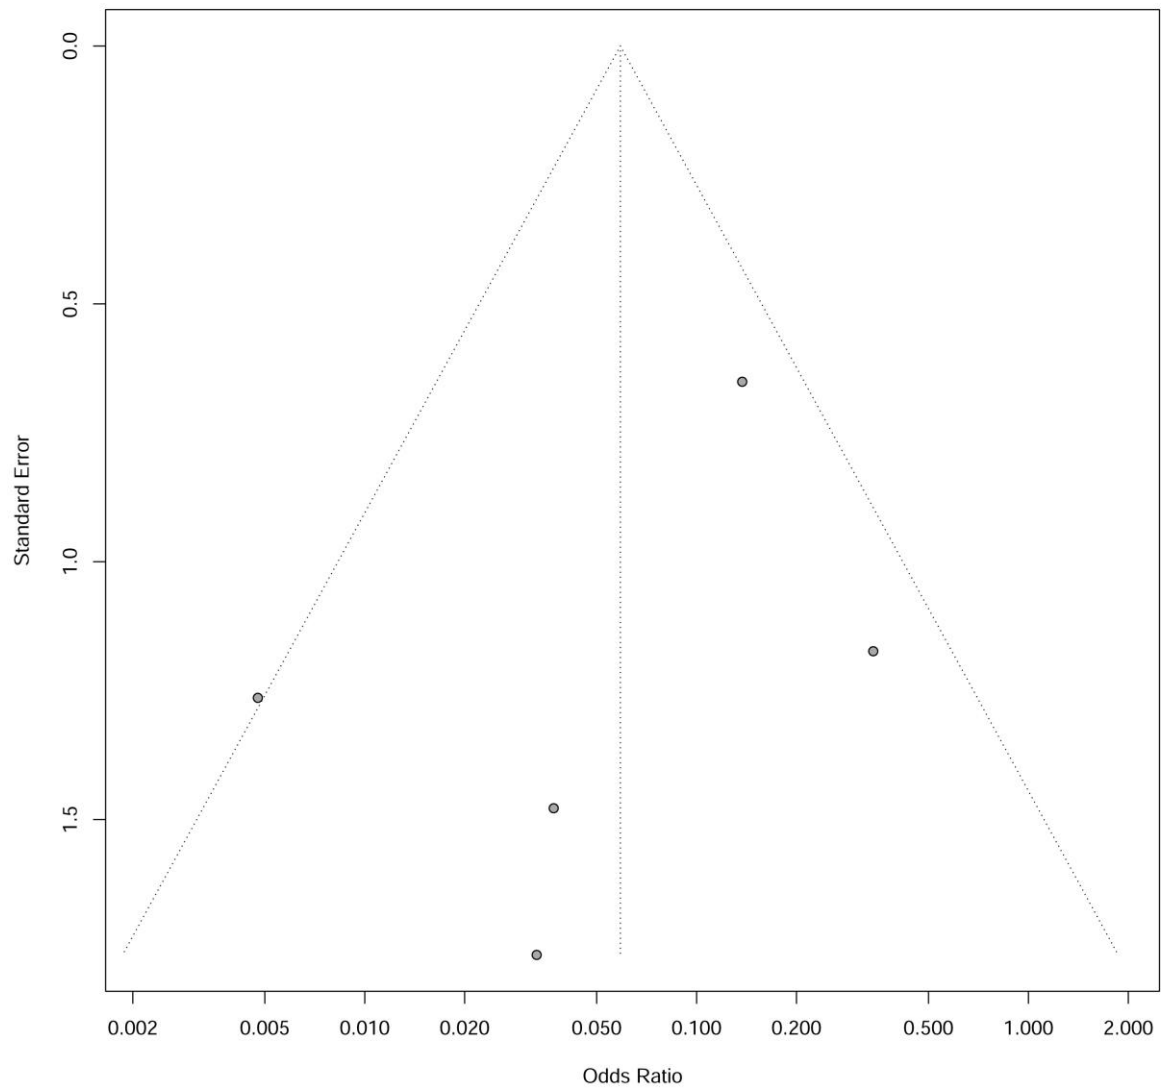

**Supplementary Figure 8. Forest plot of specimen depth of pleural cryobiopsy versus forceps biopsy**

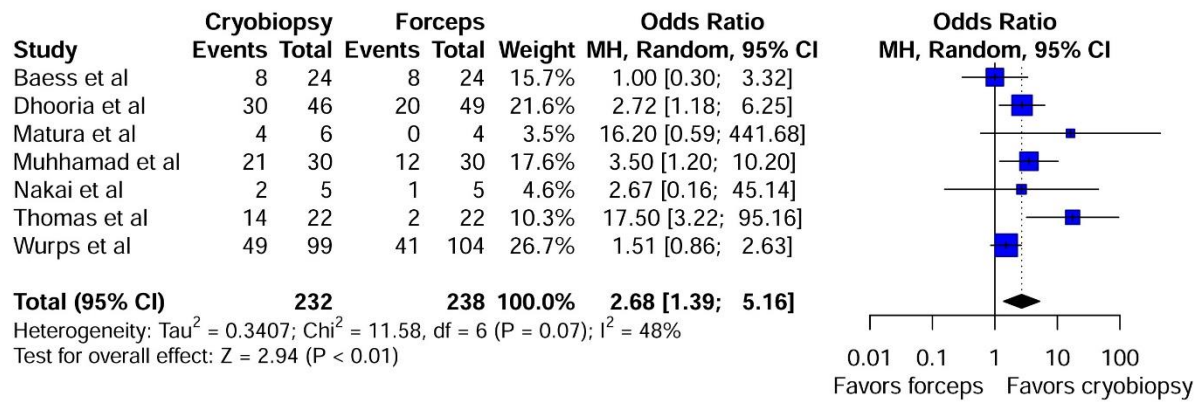

**Supplementary Figure 9. Funnel plot to detect publication bias for studies comparing specimen depth between cryobiopsy and forceps biopsy**

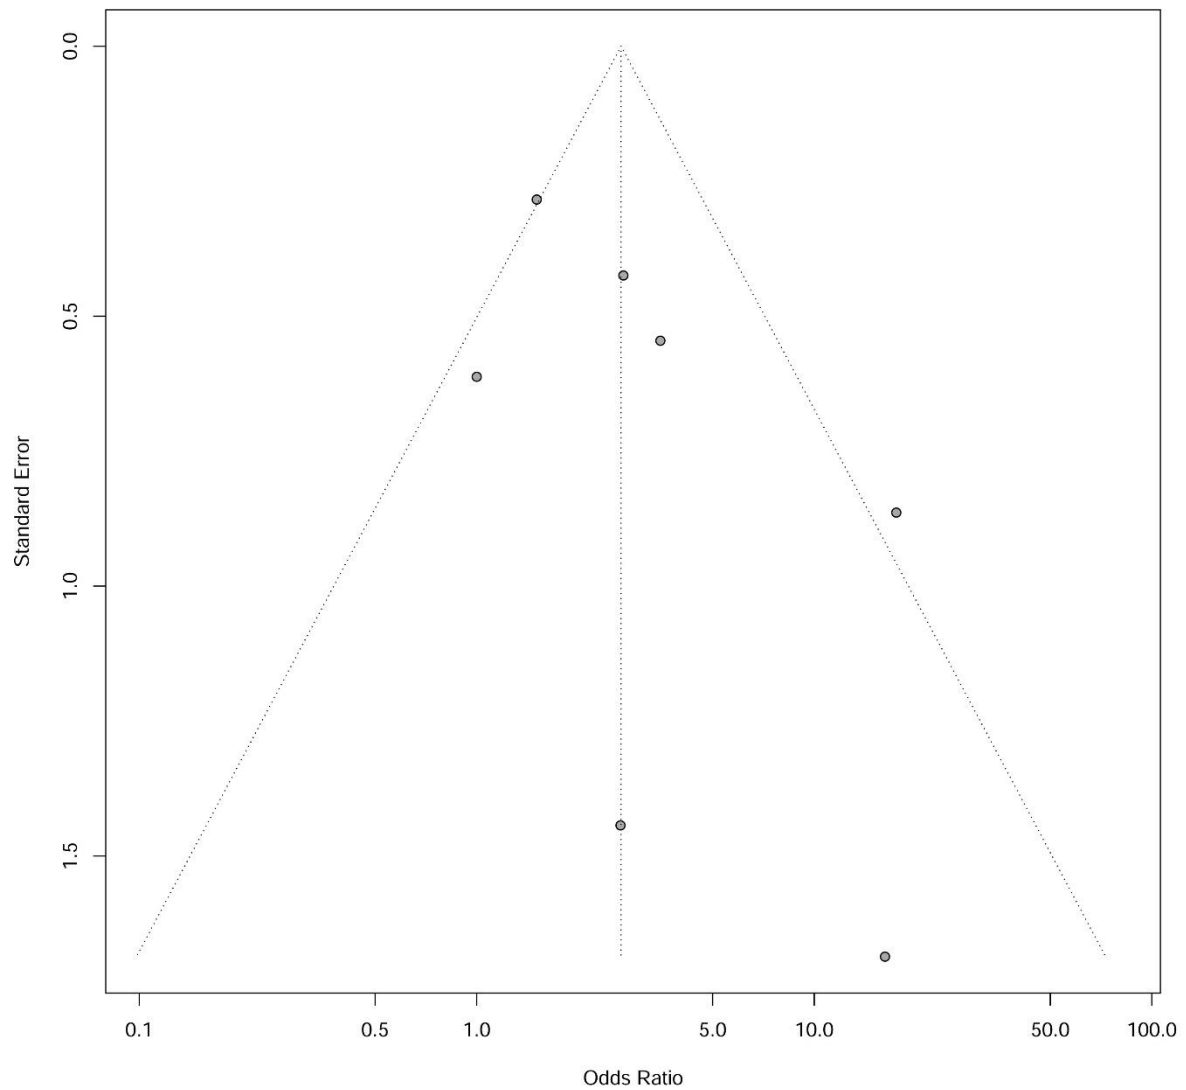

**Supplementary Figure 10. Forest plot of the leave-one-out meta-analysis of specimen depth**

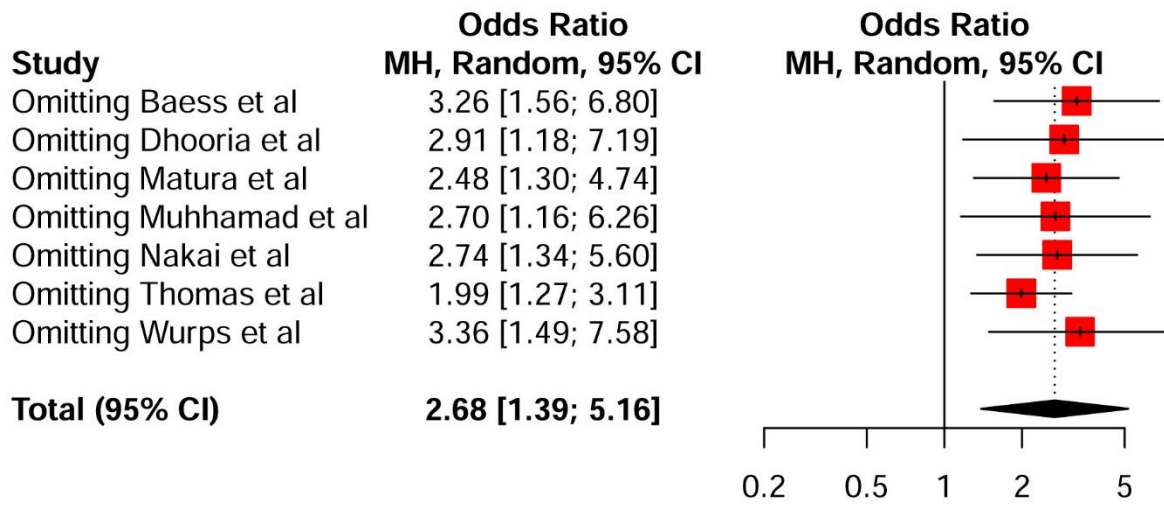

**Supplementary Figure 11. Forest plot of mild to moderate bleeding events occurred during pleural cryobiopsy versus forceps biopsy**

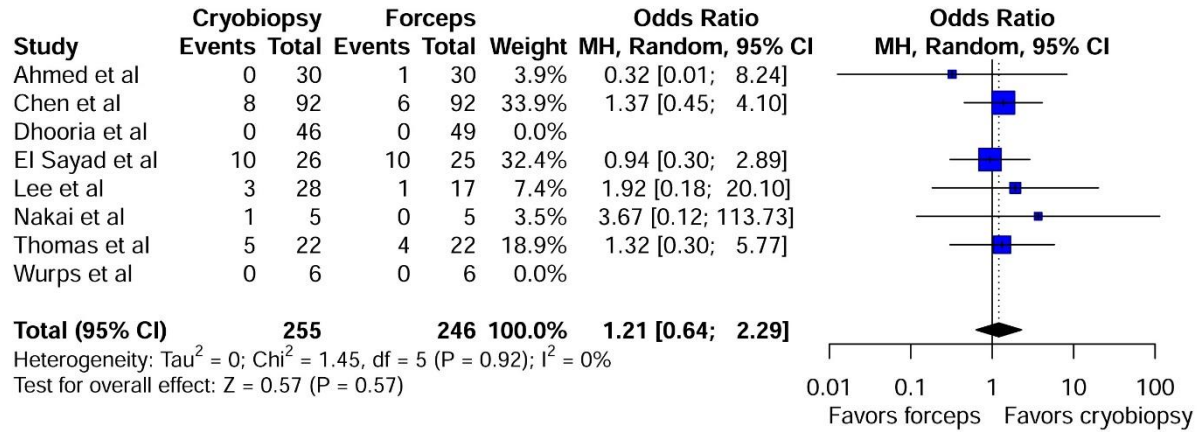

**Supplementary Figure 12. Funnel plot of studies comparing cryobiopsy versus forceps biopsy for mild to moderate bleeding events**

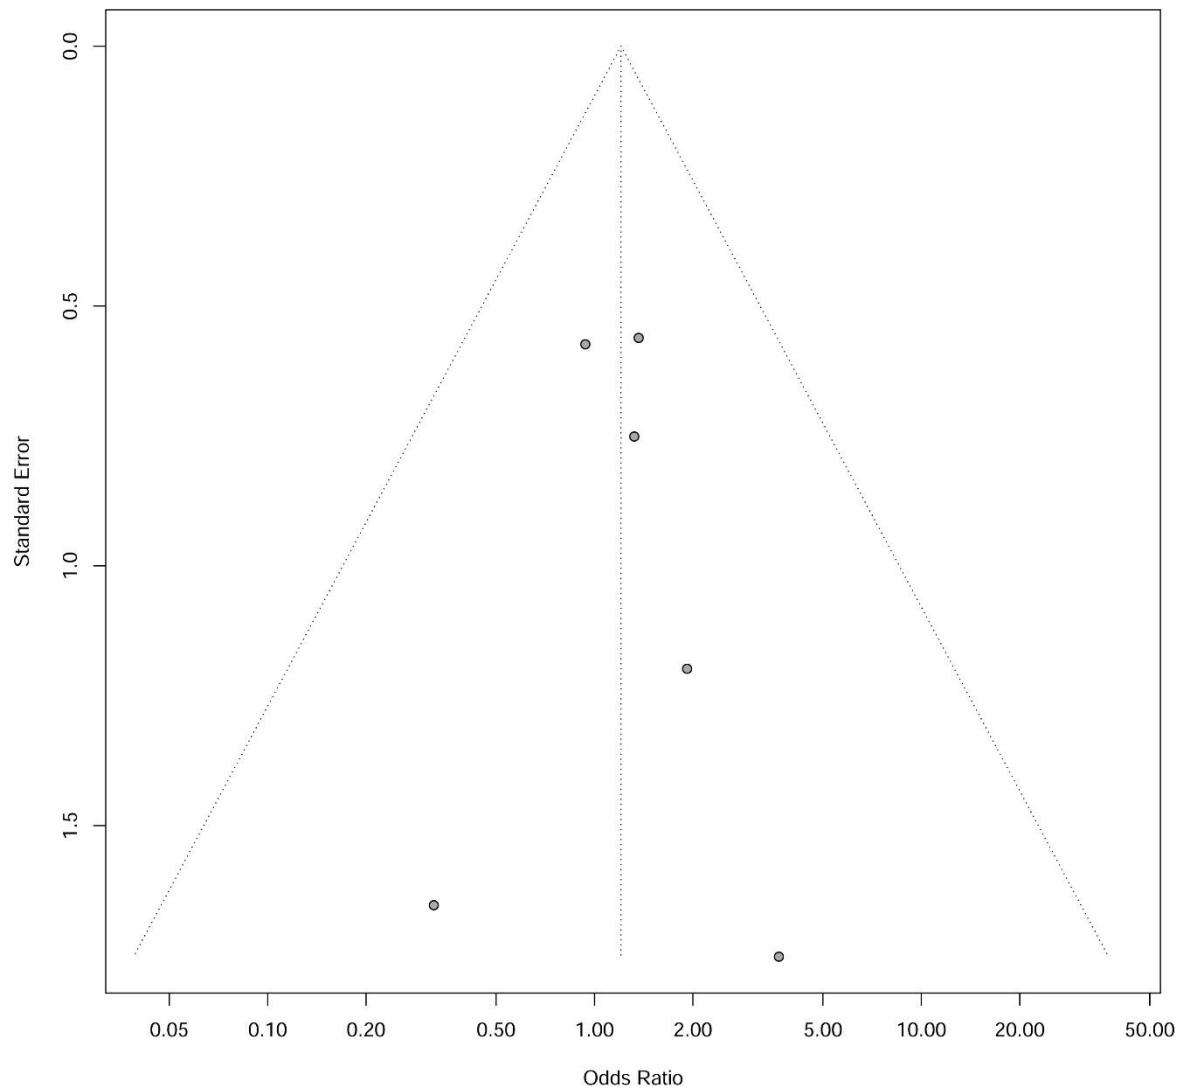

**Supplementary Figure 13. Forest plot of the leave-one-out meta-analysis of mild to moderate bleeding events**

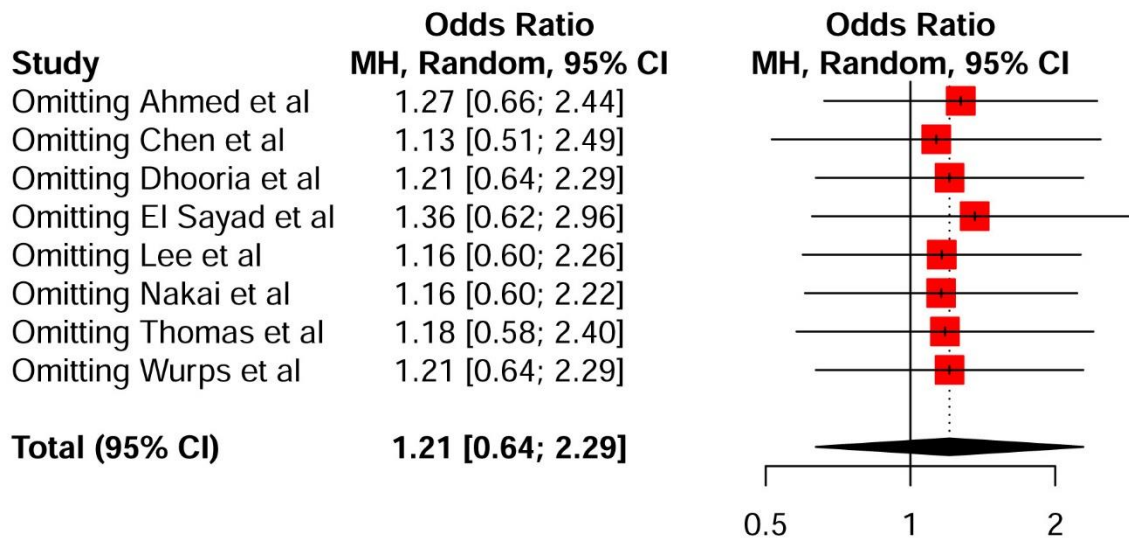



**Supplementary Table 1. Average specimen size obtained by pleural cryobiopsy and forceps biopsy**

| Study (year)                 | Average biopsy size cryobiopsy                                                                                                                       | Average biopsy size forceps biopsy                                                                                                        |
|------------------------------|------------------------------------------------------------------------------------------------------------------------------------------------------|-------------------------------------------------------------------------------------------------------------------------------------------|
| Ahmed et al                  | NR                                                                                                                                                   | NR                                                                                                                                        |
| Baess et al                  | $4.1 \pm 2.4 \text{ cm}^2$ (Surface area $\pm$ SD)                                                                                                   | $2.7 \pm 1 \text{ cm}^2$ (Surface area $\pm$ SD)                                                                                          |
| Chen et al <sup>12</sup>     | $9.4\text{mm} \pm 4.9 \text{ mm}$ (mean size $\pm$ SD)                                                                                               | $4.2\text{mm} \pm 2.3 \text{ mm}$ (mean size $\pm$ SD)                                                                                    |
| Dhoooria et al <sup>23</sup> | 7 mm(6–10) (median size, range)                                                                                                                      | 4 (3–5) (median size, range)                                                                                                              |
| El Sayad et al               | $14.07 \pm 4.29$ (mean size $\pm$ SD)                                                                                                                | $5.04 \pm 0.53$ (mean size $\pm$ SD)                                                                                                      |
| Ismail et al                 | NR                                                                                                                                                   | NR                                                                                                                                        |
| Lee et al <sup>13</sup>      | $9.1 \pm 5.7\text{mm}$ (mean size $\pm$ SD)<br>$56.0 \pm 61.3 \text{ mm}^2$ (mean area $\pm$ SD)<br>$232.1 \pm 411.4 \text{ mm}^3$ (volume $\pm$ SD) | $5.3 \pm 3.8$ (mean size $\pm$ SD)<br>$10.2 \pm 14.3 \text{ mm}^2$ (mean area $\pm$ SD)<br>$13.4 \pm 22.6 \text{ mm}^3$ (volume $\pm$ SD) |
| Matura et al <sup>14</sup>   | $9.17 \pm 1.84 \text{ mm}$ (mean size $\pm$ SD)                                                                                                      | $3.75 \pm 0.96 \text{ mm}$ (mean size $\pm$ SD)                                                                                           |
| Muhhamad et al <sup>15</sup> | $0.338 \pm 0.247 \text{ cm}^2$ (Surface area $\pm$ SD)                                                                                               | $0.819 \pm 0.404 \text{ cm}^2$ (Surface area $\pm$ SD)                                                                                    |
| Nakai et al <sup>16</sup>    | $18.9 (15.2\text{--}19.8) \text{ mm}^2$ (cross-sectional area ; median, range)                                                                       | $6.7 (5.9\text{--}6.8) \text{ mm}^2$ (cross-sectional area ; median, range)                                                               |
| Pathak et al <sup>17</sup>   | $320 \text{ mm}^3$ mean tissue volume                                                                                                                | $80 \text{ mm}^3$ mean tissue volume                                                                                                      |
| Rozman et al <sup>21</sup>   | NR                                                                                                                                                   | NR                                                                                                                                        |
| Thomas et al <sup>18</sup>   | 10 (7-15.8) mm (median size, range)                                                                                                                  | 4 (3-8) mm (median size, range)                                                                                                           |
| Tousheed et al <sup>19</sup> | $13.2 \pm 6.7 \text{ mm}$ (mean size $\pm$ SD)                                                                                                       | $6.8 \pm 3.3 \text{ mm}$ (mean size $\pm$ SD)                                                                                             |
| Wurps et al <sup>20</sup>    | $14.4 \pm 12.8 \text{ mm}^2$ (mean area $\pm$ SD)                                                                                                    | $7.1 \pm 9.3 \text{ mm}^2$ (mean area $\pm$ SD)                                                                                           |

NR= Not reported

**Supplementary Table 2. Artefacts reported in included studies comparing pleural cryobiopsy versus forceps biopsy**

| Author         | Occurrence of artefacts  | Number of patients in CB, n (%) | Number of patients in FB, n (%) |
|----------------|--------------------------|---------------------------------|---------------------------------|
| Baess et al    | Crushed cells negative   | 17/24 (70.8)                    | 6/24 (25)                       |
|                | Crushed cells <5%        | 6/24 (25)                       | 14/24 (58.3)                    |
|                | Crushed cells 5-10%      | 1/24 (4.2)                      | 0/24 (0)                        |
|                | Crushed cells 10-25%     | 0/24 (0)                        | 4/24 (16.7)                     |
| Doorria et al  | None                     | 45/46 (97.8)                    | 46/49 (93.9)                    |
|                | Crush                    | 1/46 (2.2)                      | 3/49 (6.1)                      |
|                | Freeze                   | 0/46 (0)                        | 0/49 (0)                        |
| Matura et al   | Crush artefacts          | 0/6 (0)                         | 3/4 (75)                        |
| Muhhamad et al | Crushed cells            | 0/30 (0)                        | 9/30 (30)                       |
|                | No crushed cells         | 30/30 (100)                     | 21/30 (70)                      |
| Thomas et al   | Crush artefacts nil      | 20/22 (91)                      | 1/22 (4.5)                      |
|                | Crush artefacts mild     | 1/22 (4.5)                      | 19/22 (86.4)                    |
|                | Crush artefacts moderate | 1/22 (4.5)                      | 2/22 (9.1)                      |
|                | Crush artefacts severe   | 0/22 (0)                        | 0/22 (0)                        |

**Supplementary Table 3. Qualitative analysis of depth of biopsy between pleural cryobiopsy and forceps biopsy**

| Author         | Depth of tissue                     | Number of patients in CB, n (%) | Number of patients in FB, n (%) |
|----------------|-------------------------------------|---------------------------------|---------------------------------|
| Baess et al    | Fat cells negative                  | 12/24 (50)                      | 8/24 (33.3)                     |
|                | Fat cells <5%                       | 4/24 (16.7)                     | 8/24 (33.3)                     |
|                | Fat cells (5-10%)                   | 5/24 (20.8)                     | 2/24 (8.3)                      |
|                | Fat cells (10-25%)                  | 3/24 (12.5)                     | 6/24 (25)                       |
| Doorina et al  | Up to mesothelial connective tissue | 16/46 (34.8)                    | 29/49 (59.2)                    |
|                | Up to extrapleural fat or deeper    | 30/46 (65.2)                    | 20/49 (40.8)                    |
| Matura et al   | Subpleural adipose tissue           | 4/6 (66.7)                      | 0/4 (0)                         |
| Muhhamad et al | Biopsies containing fatty tissue    | 21/30 (70)                      | 12/30 (40)                      |
|                | Biopsies containing no fat tissue   | 9/30 (30)                       | 18/30 (60)                      |
| Nakia et al    | Pleural surface                     | 1/5(20)                         | 4/5 (80)                        |
|                | Adipose tissue                      | 2/5 (40)                        | 1/5(20)                         |
|                | Skeletal muscle                     | 2/5 (40)                        | 0/5 (0)                         |
| Thomas et al   | Fibrotic pleura                     | 22/22 (100)                     | 21/22 (95.5)                    |
|                | Adipose tissue                      | 14/22 (63.6)                    | 5/22 (22.7)                     |
|                | Skeletal muscle                     | 10/22 (45.5)                    | 2/22 (9.1)                      |
|                | Lung                                | 1/22 (4.5)                      | 1/22 (4.5)                      |
|                | Fragments                           | 0/22 (0)                        | 1/22 (4.5)                      |
| Wurps et al    | Biopsies including fatty tissue     | 49/99 (49.5)                    | 41/104 (39.4)                   |
|                | Biopsies Negative for fatty tissue  | 50/99 (50.5)                    | 63/104 (60.6)                   |

CB, cryobiopsy; FB, Forceps biopsy
